# Supplementary material for: Coordination of hydrogen-bonding and π–π stacking induced elasticity and efficient optical-waveguiding in 4,7-bis(phenyl ethynyl)benzo[c][1,2,5] thiadiazole-based crystals
Source: Royal Society of Chemistry journal article supplement (doi:10.1039/d4tc02511c), 2024-01-01
Supplement: d4tc02511c1.pdf [file d4tc02511c1.pdf]

## Supporting Information

### Coordination of hydrogen-bond and $\pi$ - $\pi$ stacking induced elasticity and efficient optical-waveguide of 4,7-bis(phenylethynyl)benzo[c][1,2,5]thiadiazole-based crystals

Geng Li<sup>1</sup>, Yan Xia<sup>1</sup>, Kunpeng Guo<sup>1</sup>, Jie Li<sup>1\*</sup>, Yongli Yan<sup>2\*</sup>, Yoshimitsu Sagara<sup>3</sup>, Yongzhen Yang<sup>1\*</sup>

<sup>1</sup> Ministry of Education Key Laboratory of Interface Science and Engineering in Advanced Materials, Taiyuan University of Technology, Taiyuan, 030024, China

<sup>2</sup> Laboratory of Photochemistry, Institute of Chemistry, Chinese Academy of Sciences, Beijing, 100190, China

<sup>3</sup> Department of Materials Science and Engineering, Tokyo Institute of Technology, Meguro-ku, Tokyo 152-8552, Japan

E-mail: [lijie01@tyut.edu.cn](mailto:lijie01@tyut.edu.cn)

[ylyan@iccas.ac.cn](mailto:ylyan@iccas.ac.cn)

[yangyongzhen@tyut.edu.cn](mailto:yangyongzhen@tyut.edu.cn)

#### Table of contents

|                                                                             |     |
|-----------------------------------------------------------------------------|-----|
| I. Experimental                                                             | S2  |
| II. Structures and photophysical properties of the crystals                 | S6  |
| III. Calculated transition dipole moment of <b>PEBTH-2N</b>                 | S9  |
| <b>IV. The PL spectra of a bendable crystal after each bending recovery</b> | S9  |
| V. Photophysical properties of the straight and curved crystals             | S9  |
| VI. Crystal data of the crystals                                            | S11 |
| VII. <sup>1</sup> H and <sup>13</sup> C NMR spectra                         | S13 |

## I. Experimental

### *General Methods*

All of the chemicals and solvents were used as received from Alfa Chemical Co. Ltd. without further purification. All oxygen or moisture-sensitive reactions were performed under a nitrogen atmosphere.

The  $^1\text{H}$  (600 MHz) and  $^{13}\text{C}$  (150 MHz) NMR spectra were recorded on a Bruker NMR 600 spectrometer with tetramethylsilane (TMS) as the internal reference and deuterated chloroform ( $\text{CDCl}_3$ ) or deuterated dimethyl sulfoxide ( $\text{DMSO-}d_6$ ) as the solvent.  $^1\text{H}$  NMR chemical shifts are reported in parts per million (ppm) relative to the solvent residual peak ( $\text{CDCl}_3$ , 7.26 ppm). Multiplicities are given as s (singlet), d (doublet), t (triplet), q (quartet), dd (doublet of doublets), dt (doublet of triplets), and m (multiplet), and the coupling constants  $J$  are given in Hz.  $^{13}\text{C}$  NMR chemical shifts are reported relative to the solvent residual peak ( $\text{CDCl}_3$ , 77.36 ppm). MALDI-TOF mass spectrometry was performed using a Waters MALDI Micro MX mass spectrometer. Elemental analyses were performed on a Vario EL III elemental analyzer. UV-vis absorption spectra were obtained using a Hitachi U-3900 spectrometer. Photoluminescence spectra were taken on an Edinburgh Instrument FLS980 spectrometer equipped with a xenon lamp. The absolute fluorescence quantum yields of the samples were measured using an integrating sphere. The transient photoluminescence decay profiles were recorded using an Edinburgh Instrument FLS980 spectrometer equipped with an EPL-375 picosecond pulsed diode laser. Single crystal X-ray diffraction data were collected on a XtaLAB Synergy R, DW system, HyPix diffractometer at 301.95 K during data collection. The structures were solved by using Olex2 with the SHELXT structure solution program using Intrinsic Phasing and refined with the SHELXL refinement package using Least Squares minimization.

## Synthesis and characterization

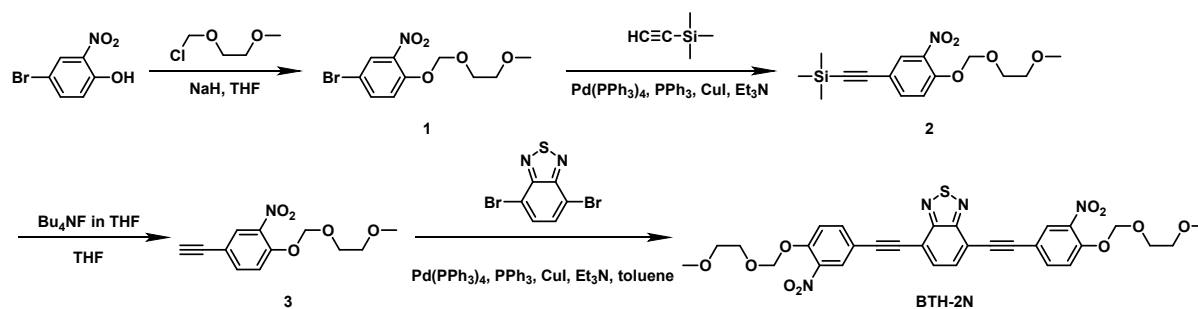

Scheme S1. Synthetic route to compound **PEBTH-2N**.

### Synthesis of intermediate 4-bromo-1-(2-methoxyethoxymethoxy)-2-nitrobenzene (**1**)

To a solution of 4-bromo-2-nitrophenol (2.0 g, 9.17 mmol) and 2-methoxyethoxymethyl chloride (5.7 g, 45.76 mmol) in tetrahydrofuran (50 mL) was added sodium hydride (0.5 g, 0.021 mol) at 0 °C. The mixture was stirred at room temperature for 10 hours. Then the solvent was evaporated under reduced pressure and the residue was dissolved in dichloromethane. The organic phase was washed with saturated NaCl solution, dried over MgSO<sub>4</sub>, and filtered. After concentrated under reduced pressure, the crude product was purified by column chromatography (petroleum ether/ethyl acetate 20/1 v/v) to yield **1** as a yellowish oil (2.53 g, 8.265 mmol, 90% yield). <sup>1</sup>H NMR (600 MHz, CDCl<sub>3</sub>) δ 7.93 (d, *J* = 2.5 Hz, 1H), 7.61 (dd, *J* = 9.0, 2.5 Hz, 1H), 7.29 (d, *J* = 9.0 Hz, 1H), 5.38 (s, 2H), 3.88 – 3.86 (m, 2H), 3.57 – 3.54 (m, 2H), 3.36 (s, 3H). <sup>13</sup>C NMR (101 MHz, CDCl<sub>3</sub>) δ 149.44, 140.96, 136.59, 127.78, 119.02, 113.14, 94.35, 71.28, 68.50, 58.82.

### Synthesis of intermediate ((4-(2-methoxyethoxymethoxy)-3-nitrophenyl)ethynyl)trimethylsilane (**2**)

To triethylamine (20 mL) solution was added compound **1** (1.0 g, 3.27 mmol), trimethylsilylacetylene (0.638 g, 6.49 mmol), triphenylphosphine (0.06 g, 0.23 mmol), cuprous iodide (0.02 g, 0.11 mmol), and tetrakis-(triphenylphosphine)-palladium (0.06 g, 0.05 mmol), successively. The reaction mixture was stirred at 65 °C for 5 hours. After cooling to room temperature, the solvent was evaporated under reduced pressure and the residue was dissolved in dichloromethane. The solution was washed with saturated NaCl solution, dried over MgSO<sub>4</sub> and filtered. After concentrated under reduced pressure, the crude product was purified by

column chromatography (petroleum ether/ethyl acetate 20/1 v/v) to yield **2** as a yellowish oil (0.96 g, 2.97 mmol, 90% yield). <sup>1</sup>H NMR (600 MHz, CDCl<sub>3</sub>) δ 7.65 (d, *J* = 1.9 Hz, 1H), 7.32 (dd, *J* = 8.7, 2.0 Hz, 1H), 7.05 (d, *J* = 8.7 Hz, 1H), 5.15 (s, 2H), 3.64 – 3.60 (m, 2H), 3.32 – 3.27 (m, 2H), 3.11 (s, 3H), 0.00 (s, 9H). <sup>13</sup>C NMR (101 MHz, CDCl<sub>3</sub>) δ 150.30, 140.40, 137.20, 128.83, 117.22, 117.12, 102.28, 95.82, 94.34, 71.53, 68.75, 59.13, 0.00.

### Synthesis of intermediate 4-ethynyl-1-(2-methoxyethoxymethoxy)-2-nitrobenzene (**3**)

To tetrahydrofuran (10 mL) solution was added compound **2** (1.0 g, 3.09 mmol) and tetrabutylammonium fluoride (1 mol/L, 4.195 mmol) solution, the reaction mixture was stirred at room temperature in the dark for about 3 hours. Then the solvent was evaporated under reduced pressure and the residue was dissolved in dichloromethane. The solution was washed with saturated NaCl solution, dried over MgSO<sub>4</sub>, and filtered. After concentrated under reduced pressure, the crude product was purified by column chromatography (petroleum ether/ethyl acetate 20/1 v/v) to yield **3** as a yellowish oil (0.66 g, 2.63 mmol, 85% yield). <sup>1</sup>H NMR (600 MHz, CDCl<sub>3</sub>) δ 7.92 (d, *J* = 1.8 Hz, 1H), 7.60 (dd, *J* = 8.7, 1.9 Hz, 1H), 7.33 (d, *J* = 8.7 Hz, 1H), 5.40 (s, 2H), 3.88 – 3.86 (m, 2H), 3.56 – 3.54 (m, 2H), 3.36 (s, 3H), 3.10 (s, 1H). <sup>13</sup>C NMR (151 MHz, CDCl<sub>3</sub>) δ 150.39, 140.19, 137.23, 128.77, 117.14, 115.71, 94.13, 80.94, 78.46, 71.29, 68.57, 58.88.

### Synthesis of and 4,7-bis((4-(2-methoxyethoxymethoxy)-3-nitrophenyl)ethynyl)benzo[*c*][1,2,5]thiadiazole (PEBTH-2N)

To triethylamine (10 mL) and toluene (23 mL) solution was added 4,7-dibromobenzo[*c*][1,2,5]thiadiazole (0.53 g, 1.81 mmol), triphenylphosphine (0.008 g, 0.1 mmol), cuprous iodide (0.008 g, 0.04 mmol), tetrakis-(triphenylphosphine)-palladium (0.025 g, 0.021 mmol), and compound **3** (1.0 g, 3.98 mmol), successively. The reaction mixture was stirred at 70 °C for 5 h. After cooling to room temperature, the solvent was evaporated under reduced pressure and the residue was dissolved in dichloromethane. Then the solution was washed with saturated NaCl solution, dried over MgSO<sub>4</sub> and filtered.

After concentrated under reduced pressure, the crude product was purified by column chromatography (dichloromethane /ethyl acetate 2/1 v/v) to yield **PEBTH-2N** as a yellow powder (1.226 g, 1.93 mmol, 58% yield). <sup>1</sup>H NMR (600 MHz, CDCl<sub>3</sub>) δ 8.12 (d, *J* = 2.2 Hz, 2H), 7.81 (s, 2H), 7.79 (dd, *J* = 8.7, 2.1 Hz, 2H), 7.44 – 7.39 (m, 2H), 5.45 (s, 4H), 3.93 – 3.89 (m, 4H), 3.60 – 3.55 (m, 4H), 3.38 (s, 6H). <sup>13</sup>C NMR (151 MHz, CDCl<sub>3</sub>) δ (ppm) 154.20, 150.70, 140.40, 137.11, 132.59, 128.75, 117.24, 116.91, 116.14, 94.81, 94.19, 86.08, 71.35, 68.68, 59.04. MS (MALDI-TOF/TOF): *m/z* calcd. for C<sub>30</sub>H<sub>26</sub>N<sub>4</sub>O<sub>10</sub>S 634.62, found 657.118 [M+Na]<sup>+</sup>.

### ***Theoretical calculation***

The transition dipole moment ( $\mu$ ) was calculated using the time-dependent density functional theory (TD-DFT) calculations at the B3LYP/6-31G(d) level using the Gaussian 09W program package. The molecular skeleton selected from the 1D needle-like crystal.

### ***Crystal growth***

1D needle-like crystals: **PEBTH-2N** (2 mg) was dissolved in the mixed solvents (1.5 mL, ethyl acetate/acetonitrile 2/1 v/v), which was then placed in a vial with unscrewed cap. Yellow crystals were obtained within one week at room temperature.

Curved crystals: **PEBTH-2N** (2 mg) was dissolved in dichloromethane (1.5 mL), which was then placed in a vial with unscrewed cap. The key process to cultivate curved crystals is preplacing a few mini crystal seeds in the bottom of the vial, then keeping the mixture in slow growth. Orange crystals were obtained within one week at room temperature.

## II. Structures and photophysical properties of the compound

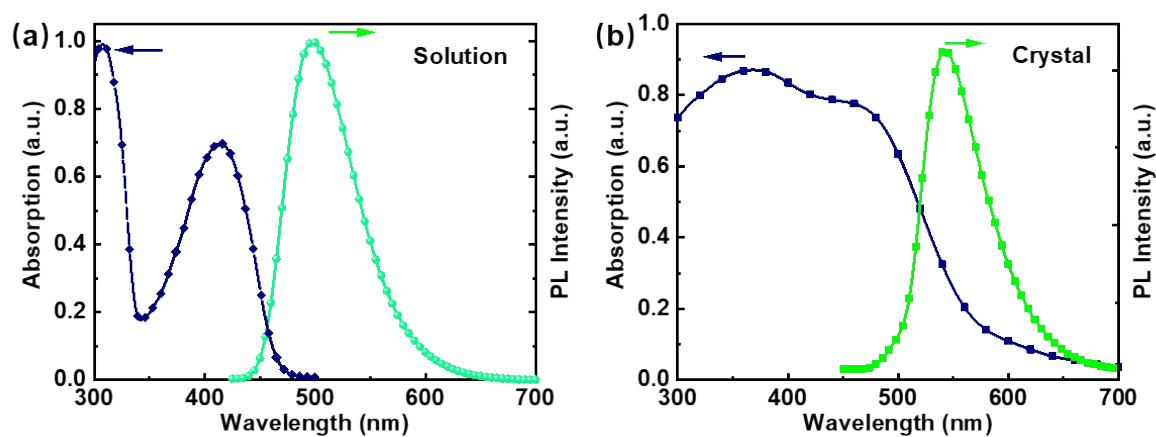

**Fig. S1** UV-vis absorption and PL spectra of **PEBTH-2N** in (a) dichloromethane ( $10^{-5}$  M,  $\epsilon = 87000$ ) and (b) crystal cultivated from ethyl acetate and acetonitrile.

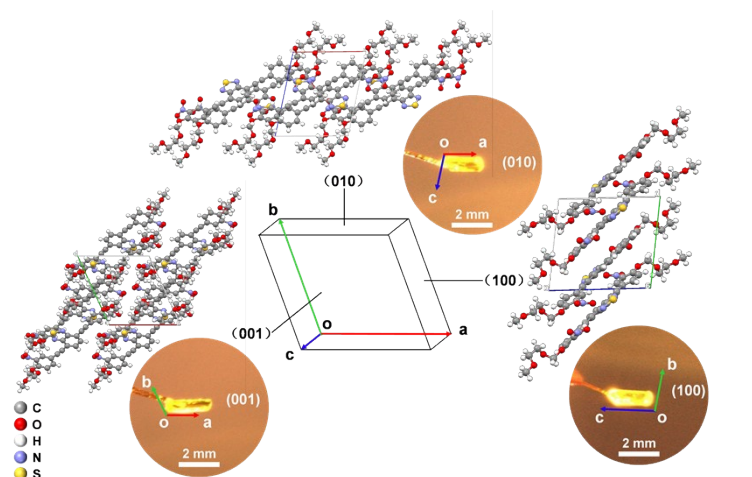

**Fig. S2** Images of a **PEBTH-2N** single crystal and packing diagrams viewed down the major faces of the crystals.

**Table S1.** Fluorescence properties and structural data of isostructural polymorphs of **PEBTH-2N** obtained from various solvents

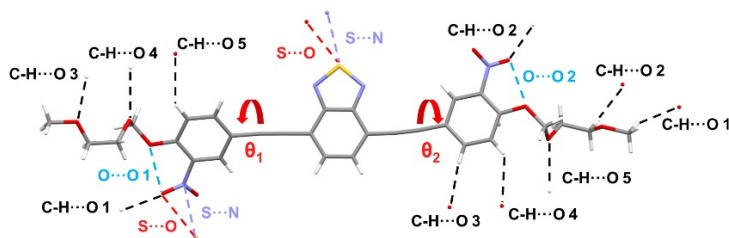

| Fluorescence<br>Parameter \ Solvent | 519 nm |         | 543 nm  | 545 nm   |          | 554 nm  |
|-------------------------------------|--------|---------|---------|----------|----------|---------|
|                                     | ACN    | DCM+ACN | EAC+ACN | EAC+EtOH | DCM+EtOH | DCM+HEX |
| $\theta_1$ (°)                      | 24.27  | 24.24   | 24.09   | 24.09    | 24.04    | 23.78   |
| $\theta_2$ (°)                      | 2.27   | 2.27    | 2.26    | 2.14     | 2.35     | 2.42    |
| O-O 1 (Å)                           | 2.613  | 2.614   | 2.616   | 2.613    | 2.606    | 2.609   |
| O-O 2 (Å)                           | 2.667  | 2.668   | 2.67    | 2.663    | 2.662    | 2.669   |
| S-N (Å)                             | 3.371  | 3.379   | 3.381   | 3.379    | 3.383    | 3.380   |
| S-O (Å)                             | 3.312  | 3.314   | 3.315   | 3.316    | 3.314    | 3.317   |
| $\pi$ - $\pi$ (Å)                   | 3.131  | 3.132   | 3.132   | 3.129    | 3.14     | 3.122   |
| CH-O 1 (Å)                          | 2.442  | 2.442   | 2.454   | 2.444    | 2.435    | 2.438   |
| CH-O 2 (Å)                          | 2.716  | 2.712   | 2.714   | 2.711    | 2.72     | 2.715   |
| CH-O 3 (Å)                          | 2.584  | 2.59    | 2.593   | 2.594    | 2.59     | 2.595   |
| CH-O 4 (Å)                          | 2.694  | 2.704   | 2.704   | 2.709    | 2.713    | 2.706   |
| CH-O 5 (Å)                          | 2.659  | 2.661   | 2.661   | 2.66     | 2.663    | 2.666   |

The abbreviation for the solvents:

ACN: acetonitrile; DCM: dichloromethane; EAC: ethyl acetate; EtOH: ethanol; HEX: hexane

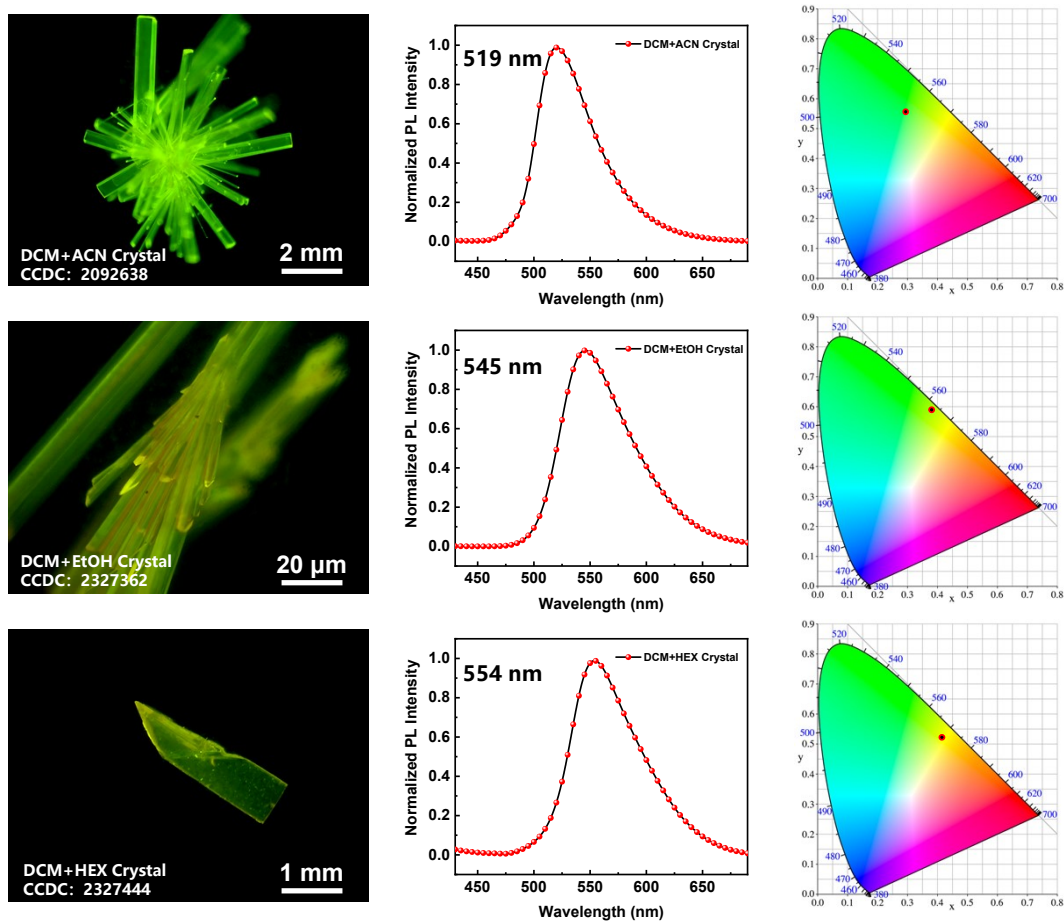

**Fig. S3** Fluorescence microscopy images and corresponding PL spectra and CIE coordinates of **PEBTH-2N** crystals with typical morphologies obtained from different solvents.

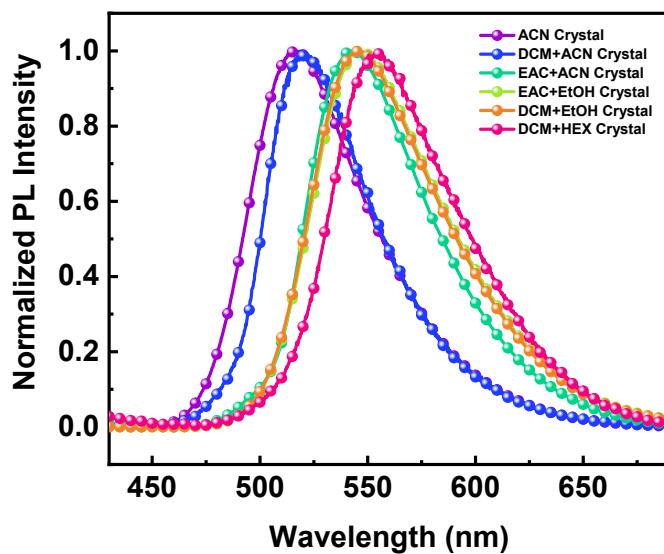

**Fig. S4** PL spectra of **PEBTH-2N** crystals obtained from various solvents.



### III. Calculated transition dipole moment of PEBTH-2N

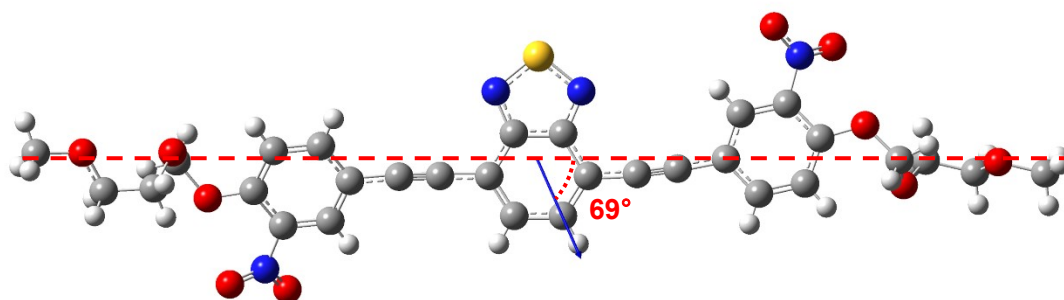

Fig. S5 Calculated transition dipole moment of the molecule in the 1D needle-like crystal

### IV. The PL spectra of a bendable crystal after each bending recovery

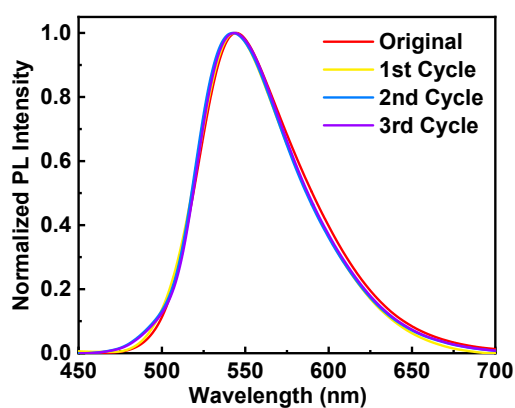

Fig. S6 The PL spectra of a bendable crystal after each bending recovery

### V. Photophysical properties of the straight and curved crystals

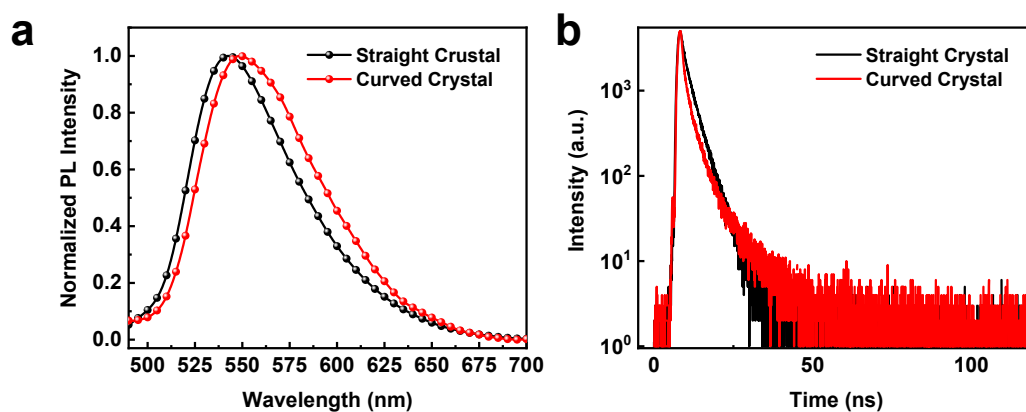

Fig. S7 (a) PL spectra and (b) time-resolved fluorescence decay profiles of the straight and curved crystals of PEBTH-2

**Table S2.** Photophysical properties of the straight needle-like crystal and the curved crystal

| Crystal  | $\lambda_{\text{PL}}$ (nm) | $\tau$ (ns) | PLQY (%) | $k_{\text{r}}$ ( $\text{s}^{-1}$ ) | $k_{\text{nr}}$ ( $\text{s}^{-1}$ ) |
|----------|----------------------------|-------------|----------|------------------------------------|-------------------------------------|
| Straight | 543                        | 2.61        | 15.2     | $5.8 \times 10^7$                  | $3.2 \times 10^8$                   |
| Curved   | 550                        | 2.73        | 5.0      | $1.8 \times 10^7$                  | $3.5 \times 10^8$                   |

## VI. Crystal data of the crystals

| Fluorescence                     | 519 nm                                                           | 543 nm                                                           | 543 nm                                                           | 545 nm                                                           | 545 nm                                                           | 554 nm                                                           |
|----------------------------------|------------------------------------------------------------------|------------------------------------------------------------------|------------------------------------------------------------------|------------------------------------------------------------------|------------------------------------------------------------------|------------------------------------------------------------------|
| Solvent                          | ACN                                                              | DCM+ACN                                                          | EAC+ACN                                                          | EAC+EtOH                                                         | DCM+EtOH                                                         | DCM+HEX                                                          |
| CCDC No.                         | 2327442                                                          | 2092638                                                          | 2172217                                                          | 2327445                                                          | 2327362                                                          | 2327444                                                          |
| Empirical formula                | C <sub>30</sub> H <sub>26</sub> N <sub>4</sub> O <sub>10</sub> S | C <sub>30</sub> H <sub>26</sub> N <sub>4</sub> O <sub>10</sub> S | C <sub>30</sub> H <sub>26</sub> N <sub>4</sub> O <sub>10</sub> S | C <sub>30</sub> H <sub>26</sub> N <sub>4</sub> O <sub>10</sub> S | C <sub>30</sub> H <sub>26</sub> N <sub>4</sub> O <sub>10</sub> S | C <sub>30</sub> H <sub>26</sub> N <sub>4</sub> O <sub>10</sub> S |
| Formula weight                   | 634.61                                                           | 634.61                                                           | 634.61                                                           | 634.61                                                           | 634.61                                                           | 634.61                                                           |
| Temperature/K                    | 293(2)                                                           | 293(2)                                                           | 293(2)                                                           | 293(2)                                                           | 293(2)                                                           | 293(2)                                                           |
| Crystal system                   | triclinic                                                        | triclinic                                                        | triclinic                                                        | triclinic                                                        | triclinic                                                        | triclinic                                                        |
| Space group                      | P-1                                                              | P-1                                                              | P-1                                                              | P-1                                                              | P-1                                                              | P-1                                                              |
| a/Å                              | 11.3990(5)                                                       | 11.3999(3)                                                       | 11.4078(2)                                                       | 11.4091(3)                                                       | 11.3944(7)                                                       | 11.4076(5)                                                       |
| b/Å                              | 11.9349(5)                                                       | 11.9421(4)                                                       | 11.95220(19)                                                     | 11.9500(3)                                                       | 11.9308(8)                                                       | 11.9590(5)                                                       |
| c/Å                              | 12.3406(6)                                                       | 12.3472(3)                                                       | 12.3521(2)                                                       | 12.3526(3)                                                       | 12.3382(7)                                                       | 12.3522(6)                                                       |
| $\alpha$ /°                      | 92.5870(10)                                                      | 92.589(2)                                                        | 92.5996(14)                                                      | 92.6180(10)                                                      | 92.546(5)                                                        | 92.643(2)                                                        |
| $\beta$ /°                       | 100.4110(10)                                                     | 100.370(2)                                                       | 100.3827(15)                                                     | 100.3390(10)                                                     | 100.445(5)                                                       | 100.271(2)                                                       |
| $\gamma$ /°                      | 113.535(2)                                                       | 113.532(3)                                                       | 113.5545(16)                                                     | 113.5900(10)                                                     | 113.502(6)                                                       | 113.6630(10)                                                     |
| Volume/Å <sup>3</sup>            | 1501.03(12)                                                      | 1503.15(8)                                                       | 1505.66(5)                                                       | 1505.39(7)                                                       | 1499.96(17)                                                      | 1505.71(12)                                                      |
| Z                                | 2                                                                | 2                                                                | 2                                                                | 2                                                                | 2                                                                | 2                                                                |
| $\rho_{\text{calc}}/\text{cm}^3$ | 1.404                                                            | 1.402                                                            | 1.400                                                            | 1.574                                                            | 1.405                                                            | 1.400                                                            |
| $\mu/\text{mm}^{-1}$             | 0.173                                                            | 0.173                                                            | 1.516                                                            | 0.753                                                            | 0.173                                                            | 0.172                                                            |
| F(000)                           | 660.0                                                            | 660.0                                                            | 660.0                                                            | 722.0                                                            | 660.0                                                            | 660.0                                                            |
| Crystal size/mm <sup>3</sup>     | 0.18 × 0.12 ×<br>0.05                                            | 0.08 × 0.04 ×<br>0.02                                            | 0.11 × 0.08 ×<br>0.05                                            | 0.15 × 0.08 ×<br>0.05                                            | 0.04 × 0.03 ×<br>0.02                                            | 0.15 × 0.1 ×<br>0.04                                             |
| Radiation                        | MoK $\alpha$ ( $\lambda$ =                                       | Mo K $\alpha$ ( $\lambda$ =                                      | CuK $\alpha$ ( $\lambda$ =                                       | MoK $\alpha$ ( $\lambda$ =                                       | Mo K $\alpha$ ( $\lambda$ =                                      | MoK $\alpha$ ( $\lambda$ =                                       |

|                                           |                            |                              |                              |                            |                            |                            |
|-------------------------------------------|----------------------------|------------------------------|------------------------------|----------------------------|----------------------------|----------------------------|
|                                           | 0.71073)                   | 0.71073)                     | 1.54184)                     | 0.71073)                   | 0.71073)                   | 0.71073)                   |
| 2 $\theta$ range for data                 |                            |                              | 7.338 to                     |                            | 3.386 to                   | 5.144 to                   |
| collection/ $^{\circ}$                    | 5.372 to 56.38             | 3.382 to 61.992              | 152.638                      | 3.752 to 56.602            | 61.936 $^{\circ}$          | 56.458                     |
|                                           | -15 $\leq$ h $\leq$ 15,    | -14 $\leq$ h $\leq$ 15, -    | -14 $\leq$ h $\leq$ 14, -    | -15 $\leq$ h $\leq$ 15, -  | -15 $\leq$ h $\leq$ 13, -  | -15 $\leq$ h $\leq$ 15, -  |
| Index ranges                              | -14 $\leq$ k $\leq$ 15,    | 16 $\leq$ k $\leq$ 15, -17   | 15 $\leq$ k $\leq$ 14, -14   | 15 $\leq$ k $\leq$ 15, -16 | 16 $\leq$ k $\leq$ 15, -17 | 15 $\leq$ k $\leq$ 12, -   |
|                                           | -16 $\leq$ l $\leq$ 16     | $\leq$ l $\leq$ 15           | $\leq$ l $\leq$ 15           | $\leq$ l $\leq$ 16         | $\leq$ l $\leq$ 15         | 16 $\leq$ l $\leq$ 16      |
| Reflections collected                     | 15606                      | 20183                        | 18803                        | 37280                      | 17561                      | 15648                      |
|                                           | 7203 [R <sub>int</sub> =   | 7501 [R <sub>int</sub> =     | 6030 [R <sub>int</sub> =     | 7430 [R <sub>int</sub> =   | 7215 [R <sub>int</sub> =   | 7252 [R <sub>int</sub> =   |
| Independent reflections                   | 0.0312, R <sub>sigma</sub> | 0.0199, R <sub>sigma</sub> = | 0.0341, R <sub>sigma</sub> = | 0.0401, R <sub>sigma</sub> | 0.0629, R <sub>sigma</sub> | 0.0329, R <sub>sigma</sub> |
|                                           | = 0.0412]                  | 0.0254]                      | 0.0344]                      | = 0.0291]                  | = 0.0912]                  | = 0.0449]                  |
| Data/restraints/parameters                | 7203/0/408                 | 7501/0/408                   | 6030/0/408                   | 7430/0/408                 | 7215/0/408                 | 7252/0/409                 |
| Goodness-of-fit on F <sup>2</sup>         | 1.072                      | 1.092                        | 0.956                        | 1.090                      | 0.820                      | 1.023                      |
| Final R indexes [I $\geq$ 2 $\sigma$ (I)] | R <sub>1</sub> = 0.0628,   | R <sub>1</sub> = 0.0504,     | R <sub>1</sub> = 0.0573,     | R <sub>1</sub> = 0.0689,   | R <sub>1</sub> = 0.0676,   | R <sub>1</sub> = 0.0744,   |
|                                           | wR <sub>2</sub> = 0.1862   | wR <sub>2</sub> = 0.1517     | wR <sub>2</sub> = 0.1649     | wR <sub>2</sub> = 0.1952   | wR <sub>2</sub> = 0.2035   | wR <sub>2</sub> = 0.2258   |
| Final R indexes [all data]                | R <sub>1</sub> = 0.0838,   | R <sub>1</sub> = 0.0706,     | R <sub>1</sub> = 0.0627,     | R <sub>1</sub> = 0.0939,   | R <sub>1</sub> = 0.1492,   | R <sub>1</sub> = 0.0999,   |
|                                           | wR <sub>2</sub> = 0.2137   | wR <sub>2</sub> = 0.1641     | wR <sub>2</sub> = 0.1723     | wR <sub>2</sub> = 0.2203   | wR <sub>2</sub> = 0.2887   | wR <sub>2</sub> = 0.2577   |
| Largest diff. peak/hole/eA <sup>-3</sup>  | 0.54/-0.35                 | 0.54/-0.34                   | 0.45/-0.48                   | 0.60/-0.62                 | 0.41/-0.26                 | 0.71/-0.35                 |

## VII. $^1\text{H}$ and $^{13}\text{C}$ NMR spectra

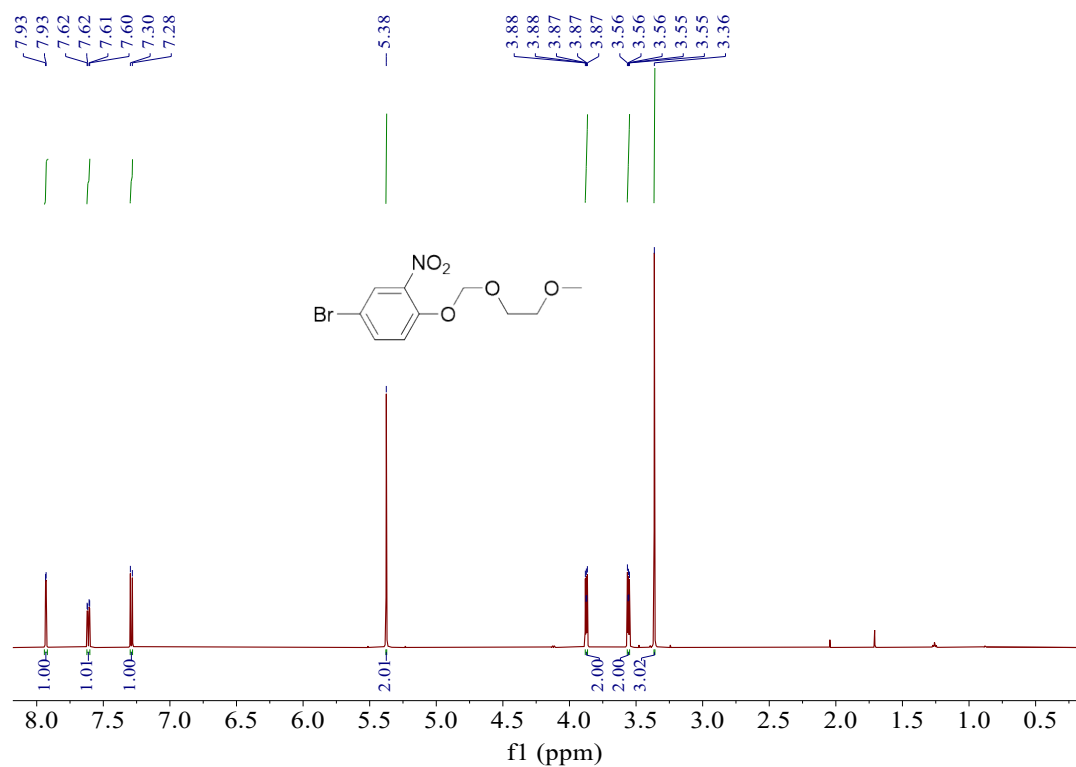

**Fig. S7**  $^1\text{H}$  NMR spectrum (600 MHz,  $\text{CDCl}_3$ ) of **1**.

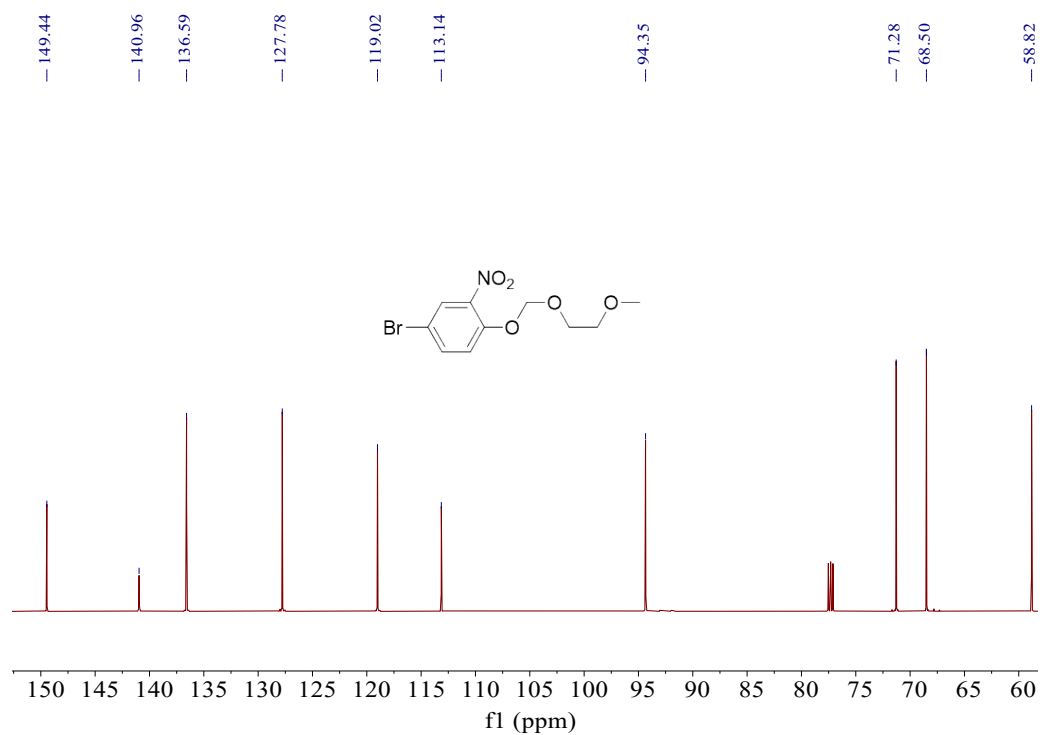

**Fig. S8**  $^{13}\text{C}$  NMR spectrum (101 MHz,  $\text{CDCl}_3$ ) of **1**.

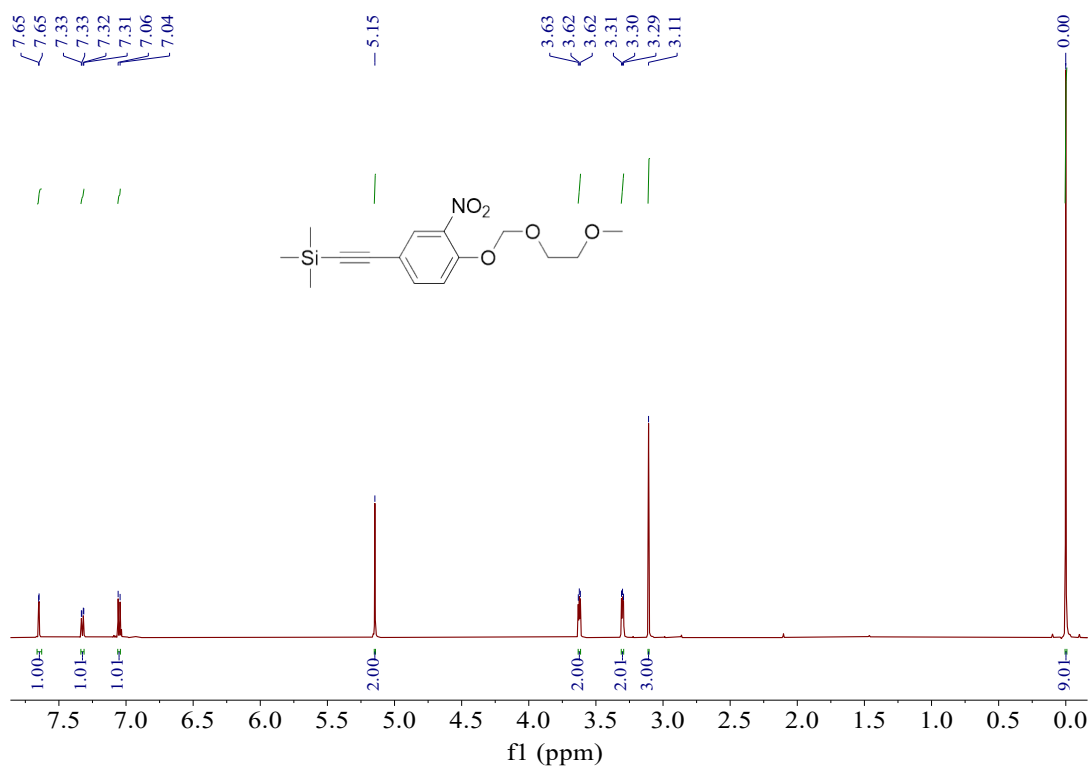

**Fig. S9** <sup>1</sup>H NMR spectrum (600 MHz, CDCl<sub>3</sub>) of 2.

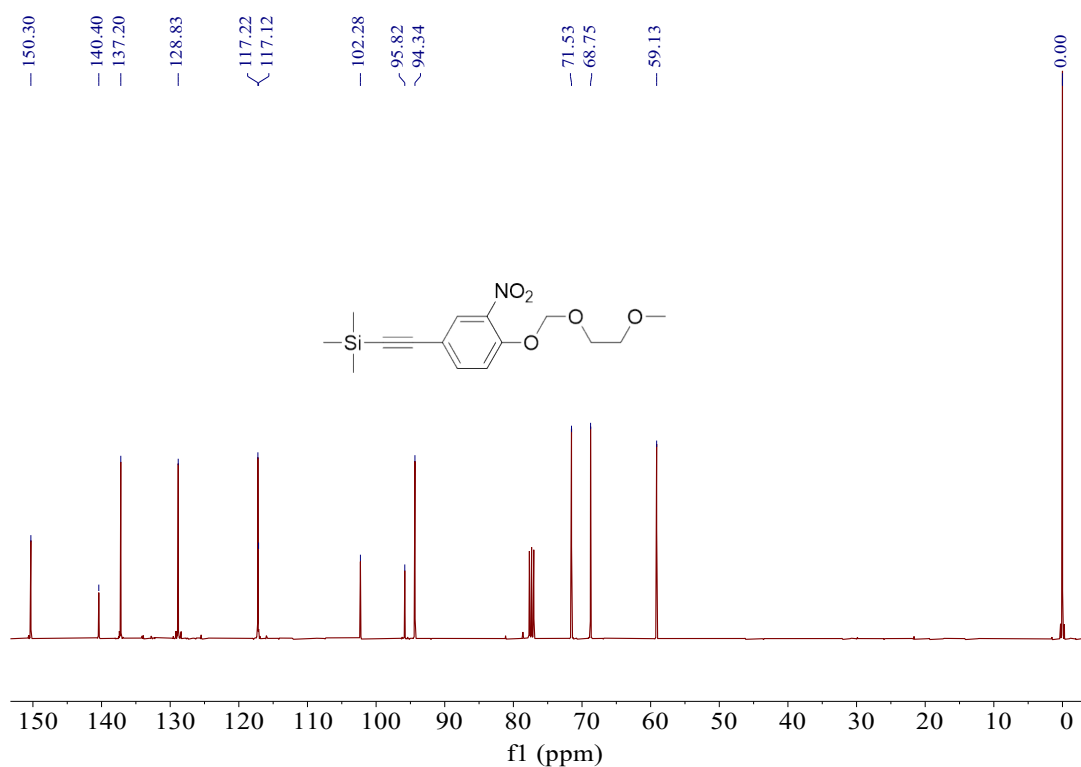

**Fig. S10** <sup>13</sup>C NMR spectrum (101 MHz, CDCl<sub>3</sub>) of 2.

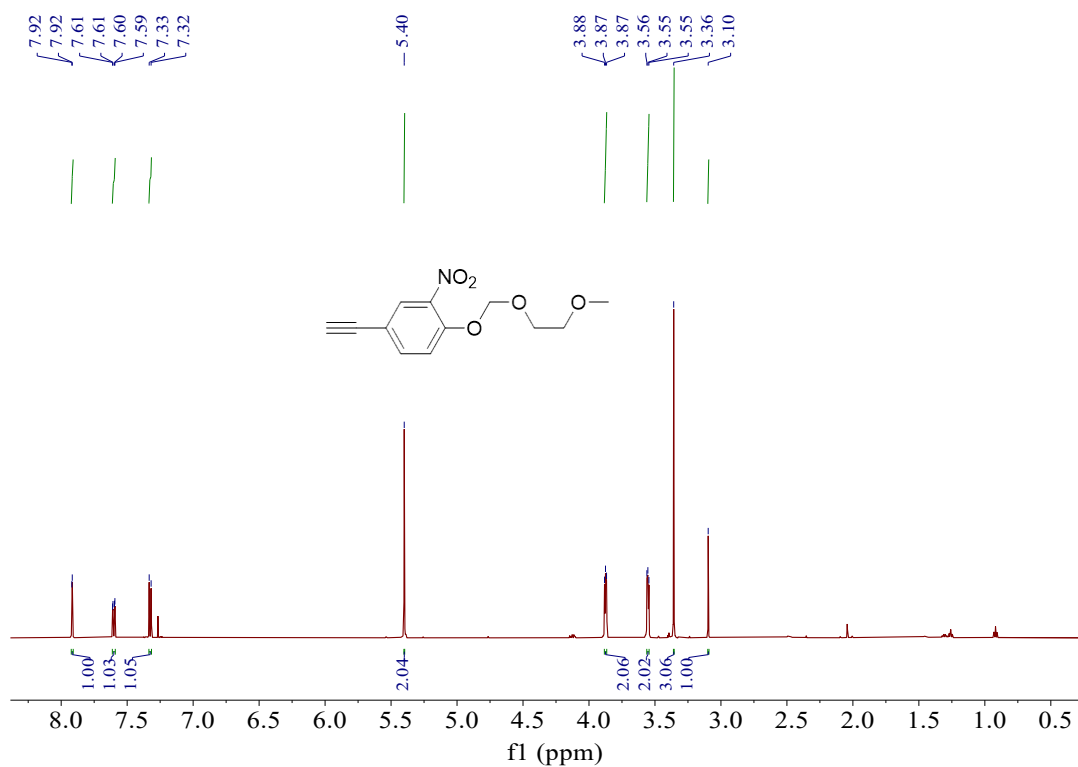

**Fig. S11** <sup>1</sup>H NMR spectrum (600 MHz, CDCl<sub>3</sub>) of **3**.

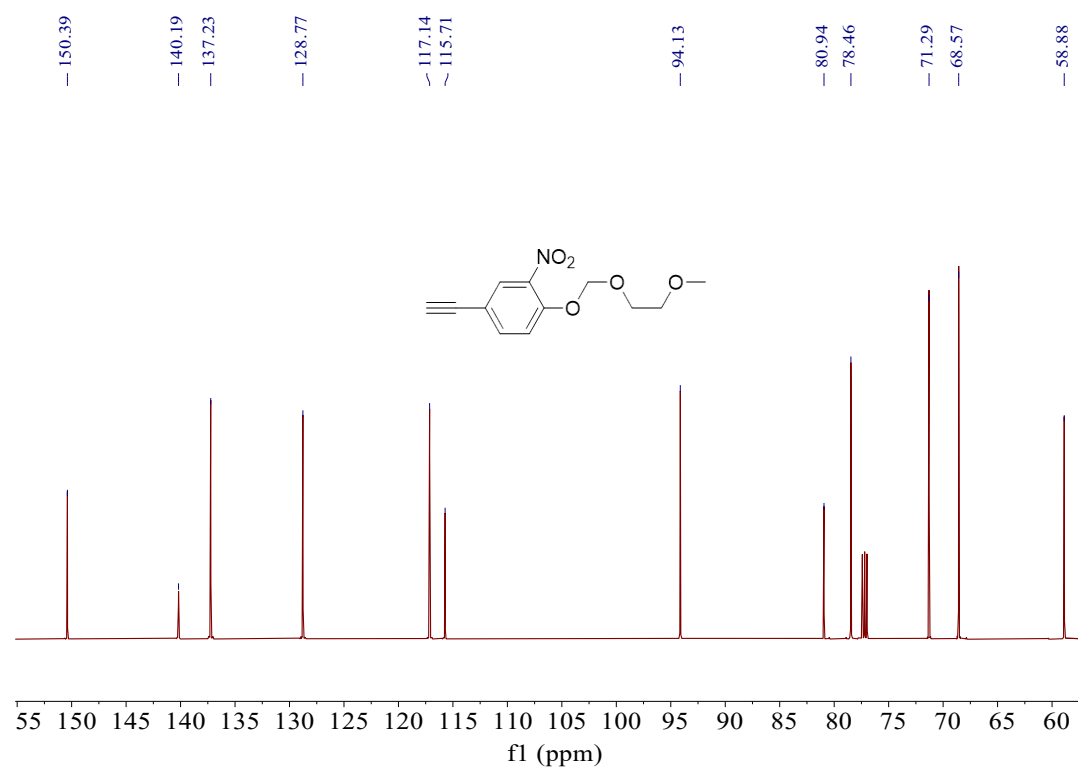

**Fig. S12** <sup>13</sup>C NMR spectrum (151 MHz, CDCl<sub>3</sub>) of **3**.

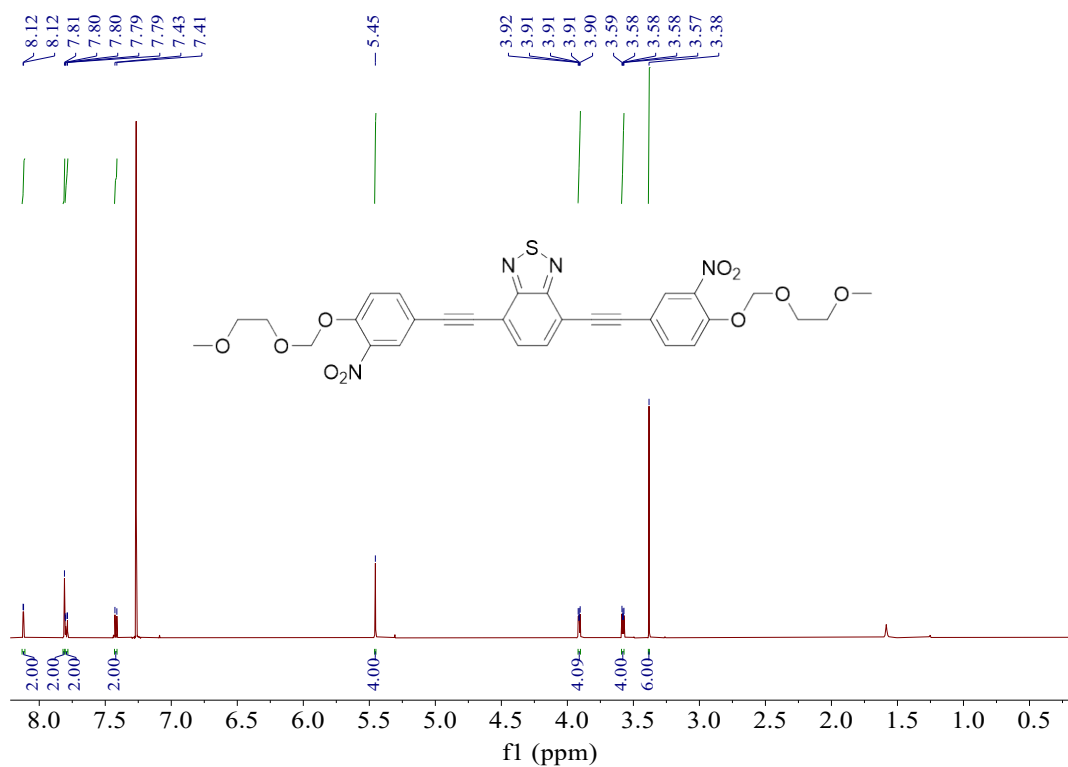

**Fig. S13**  $^1\text{H}$  NMR spectrum (600 MHz,  $\text{CDCl}_3$ ) of PEBTH-2N.

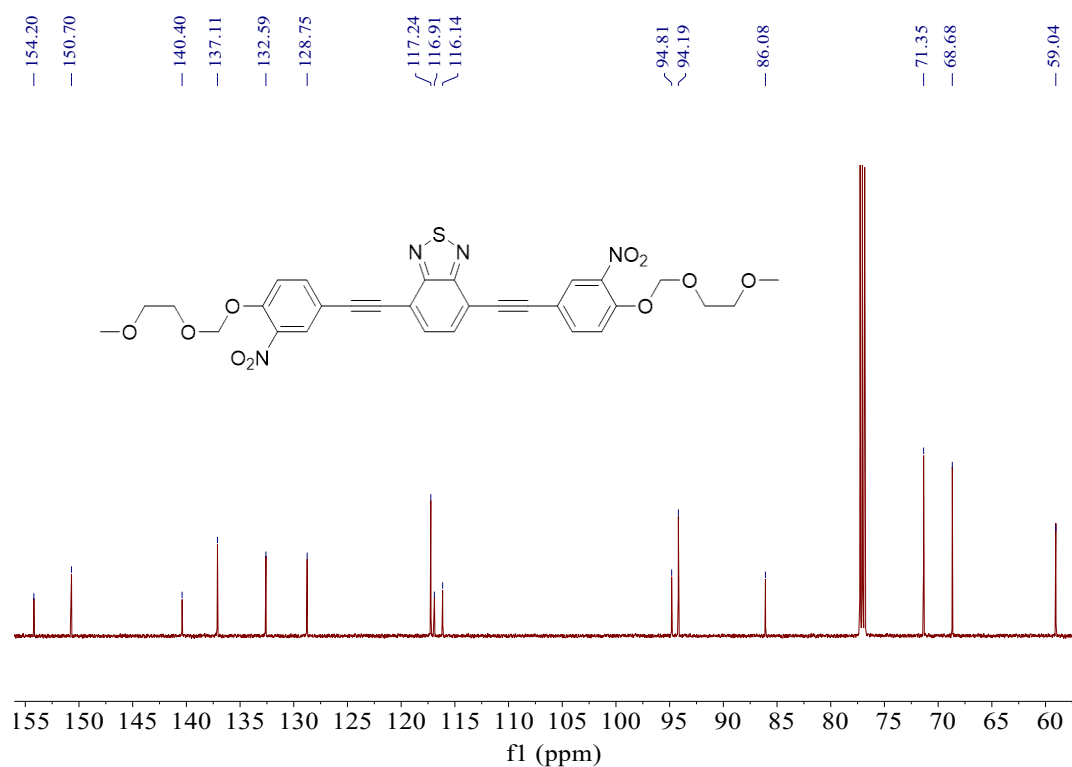

**Fig. S14**  $^{13}\text{C}$  NMR spectrum (151 MHz,  $\text{CDCl}_3$ ) of PEBTH-2N.
